# Supplementary material
Source: PubMed Central journal article supplement (PMC5287402)
Supplement: JB.00595-16_zjb999094323s1.pdf [file JB.00595-16_zjb999094323s1.pdf]

**FIG. S1. Growth curve of ST4/74 WT and mutants in MM with 1% glucose as the sole carbon source.** *S. Typhimurium* ST4/74 and mutants, including strains with complementing plasmids, used in this study were grown overnight in LB media. MM containing 1% glucose was inoculated at 1:100 and incubated for 20 h at 37 °C (not shaken). OD<sub>600</sub> was measured hourly. The experiment was performed three times, and expressed as mean ± standard derivation.

**FIG. S2. Binding of GatR to promoter fragments of *gat* genes.** (A) Overproduced GatR-His<sub>6</sub> was purified from strain ST4/74  $\Delta$ *araA* cultivated in LB medium (left) or in MM with galactitol (right), and increasing amounts of the protein were incubated with a 300 bp fragment representing the promoter of *gatR*. EMSAs were then performed by separation of the DNA/GatR-His<sub>6</sub> mixtures on 12% polyacrylamide gels. Competitor DNA representing the promoter of *argS* (50 ng) served as control. The molar excess of protein to DNA is indicated. The GeneRuler DNA ladder mix was used as a marker. (B) As above using promoter fragments of *gatZ* and *gatY*. GatR-His<sub>6</sub> isolated from cultures grown in MM with galactitol was used.

**FIG. S3. Growth curves of ST4/74, ST4/74  $\Delta$ *crp*, and ST4/74  $\Delta$ *crp*/pBAD-*crp*.** Growth conditions are described in the legend of FIG. S1.

FIG. S1

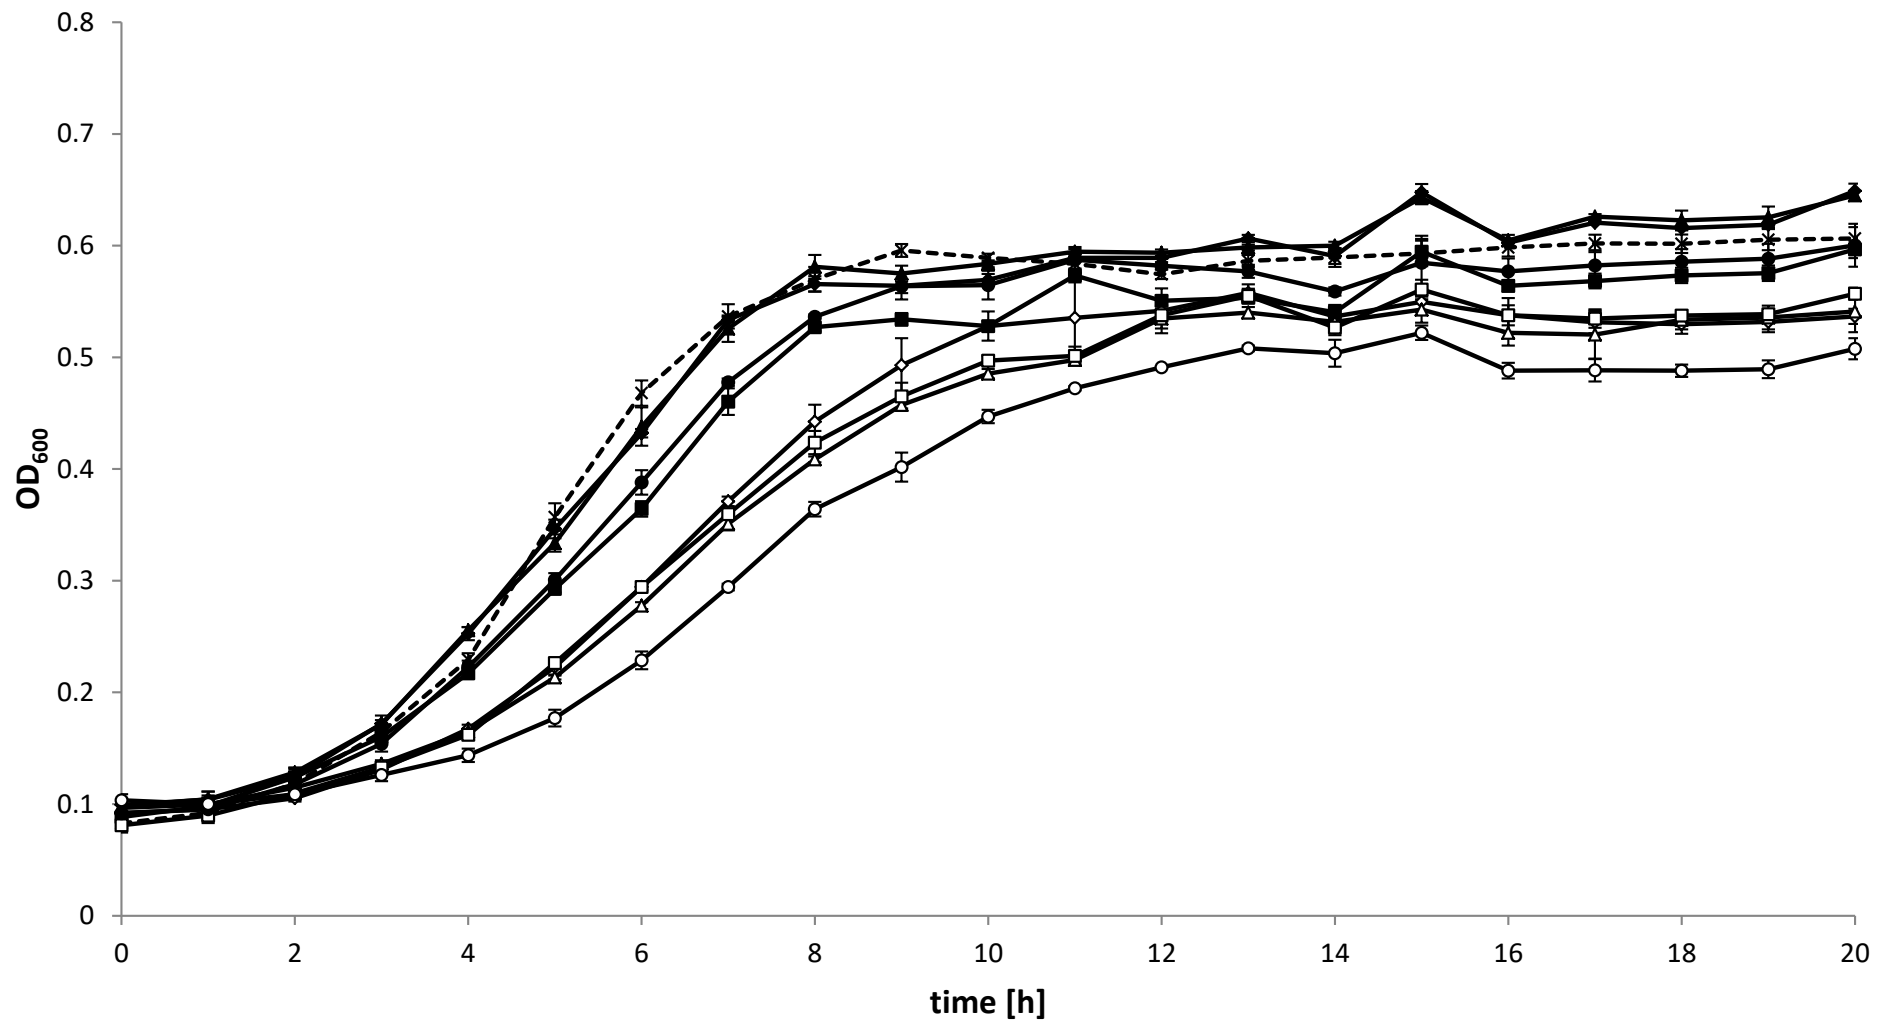

—◆— ST4/74  $\Delta$ 3254

—▲— ST4/74  $\Delta$ gatC

—■— ST4/74  $\Delta$ gatR-HTH

—●— ST4/74  $\Delta$ gatR-DeoR

—◇— ST4/74  $\Delta$ 3254/pBR-3254

—△— ST4/74  $\Delta$ gatC/pBR-gatC

—□— ST4/74  $\Delta$ gatR-HTH/pBR-gatR

—○— ST4/74  $\Delta$ gatR-DeoR/pBR-gatR

--x-- ST4/74

FIG. S2

A

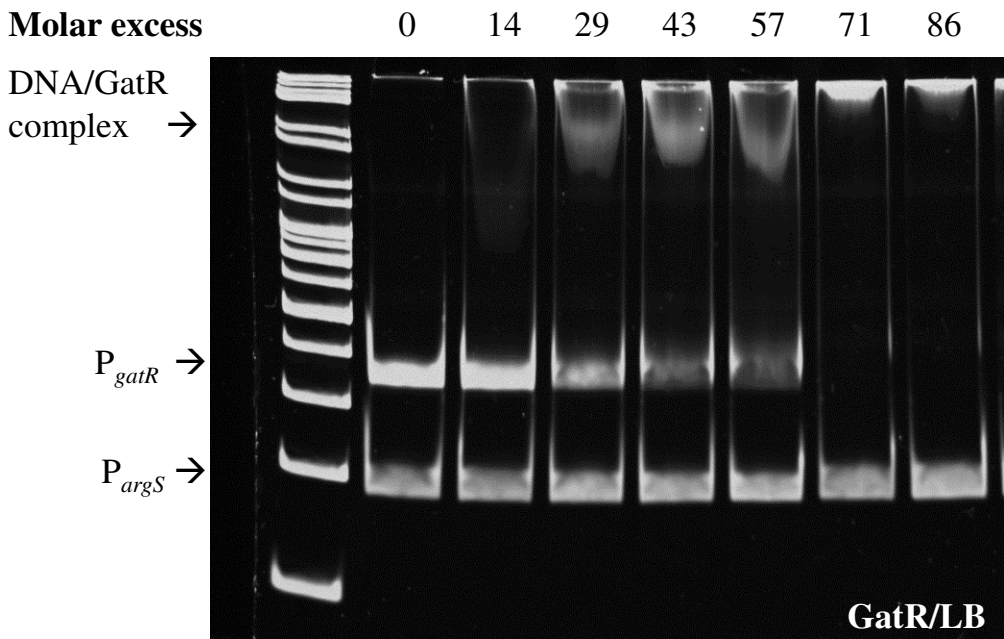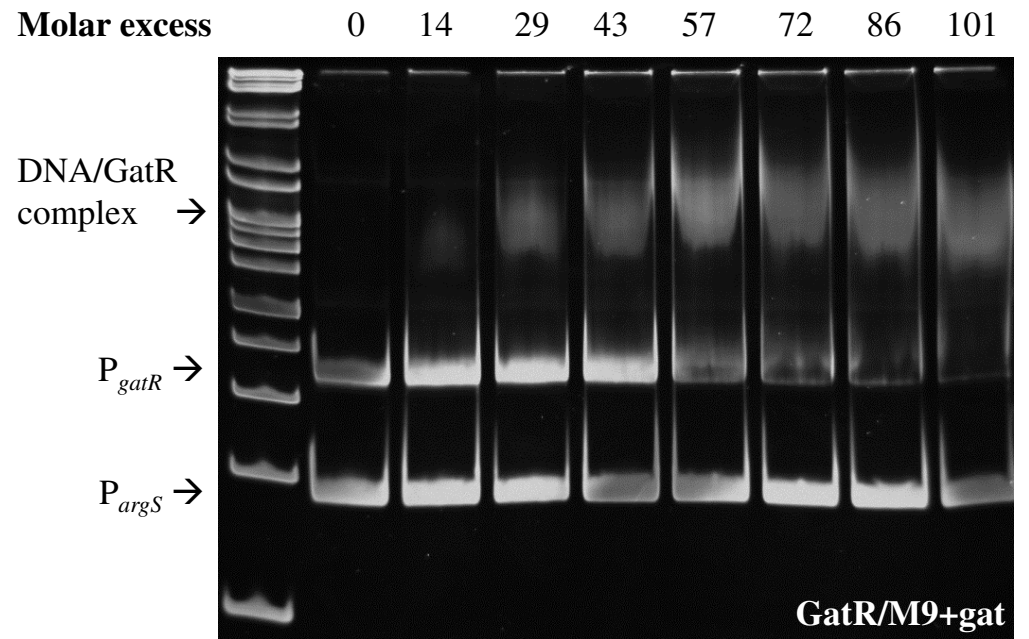

B

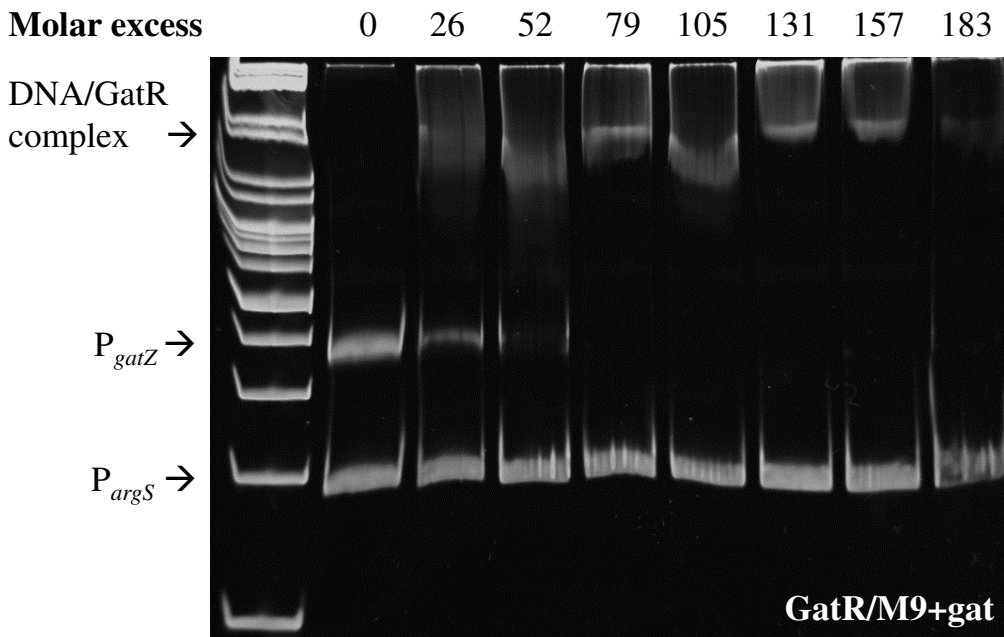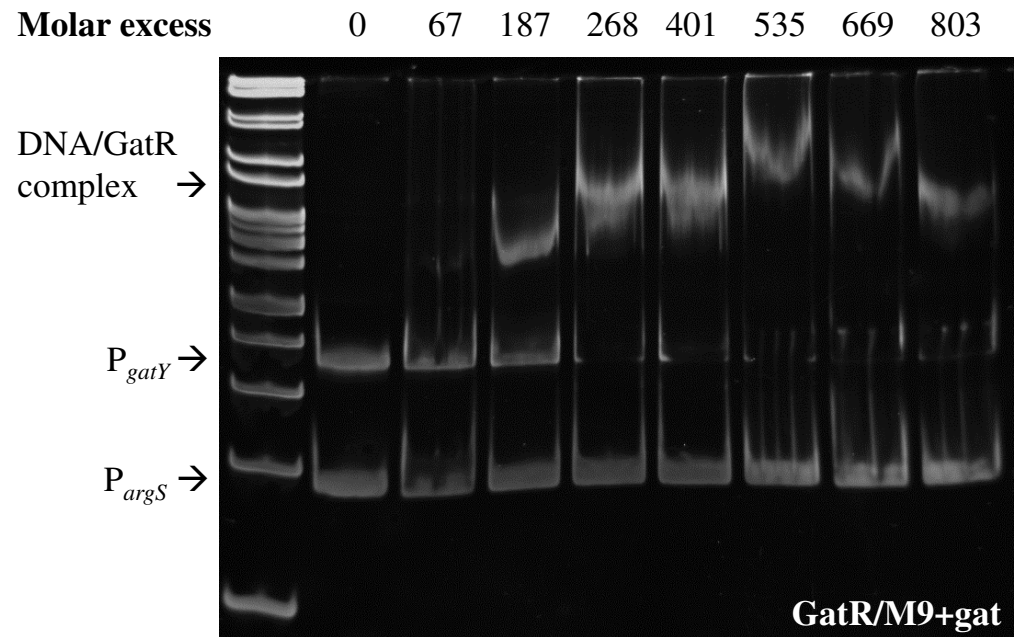

FIG. S3

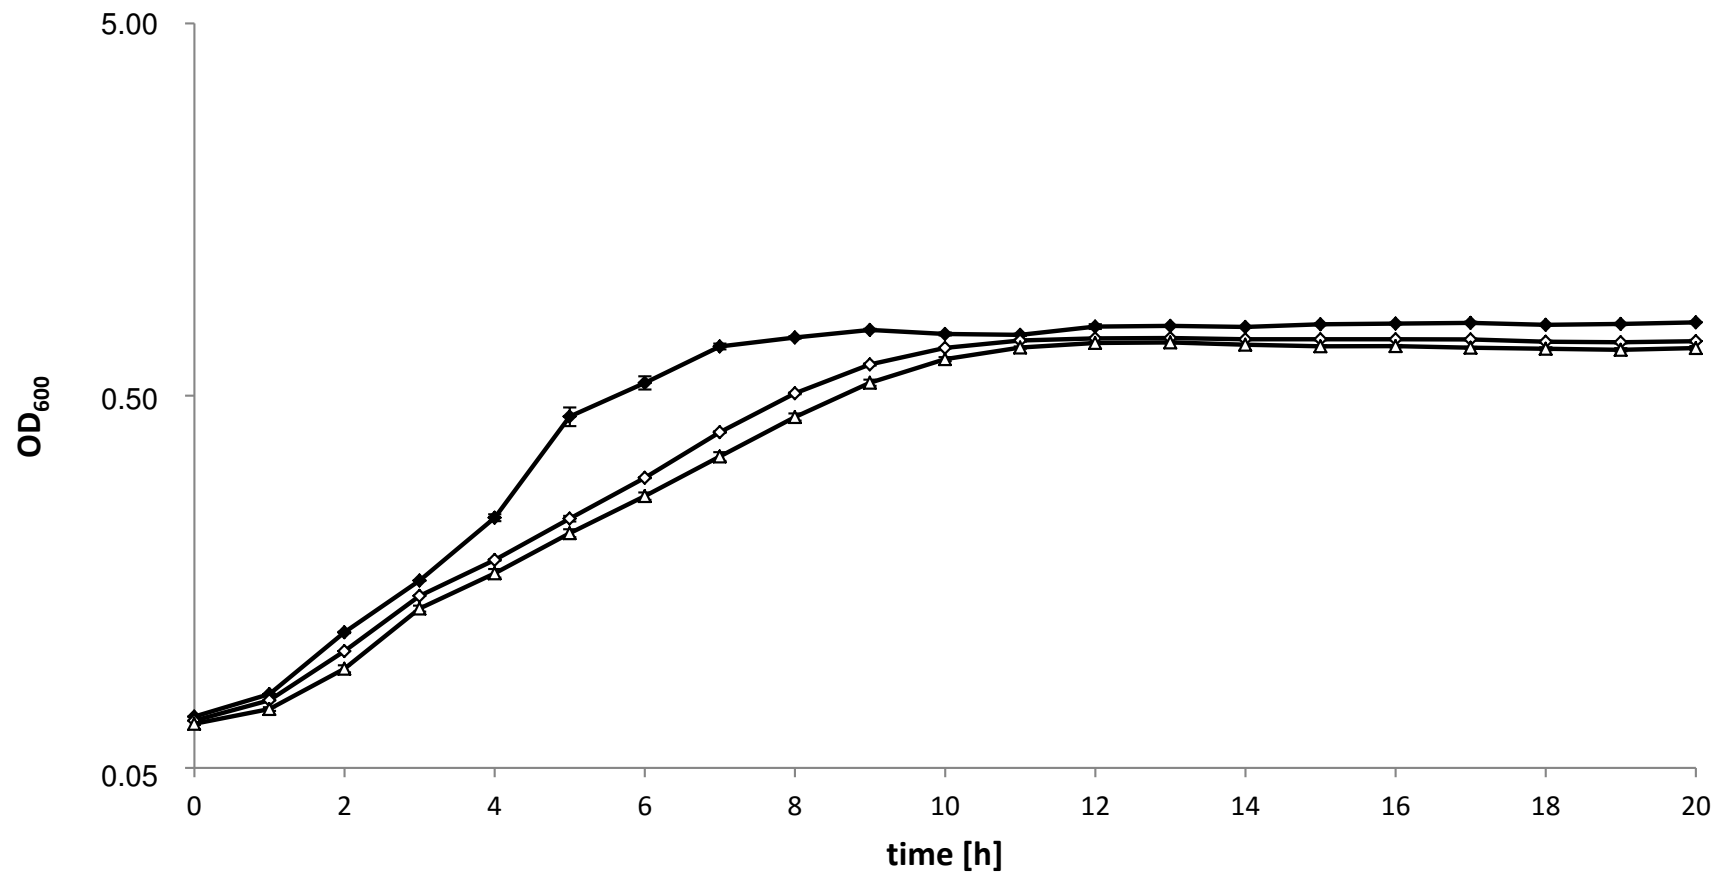

—◆— ST4/74

—◇— ST4/74  $\Delta$ crp

—△— ST4/74  $\Delta$ crp/pBAD-crp

TABLE S1. Primers used in this study.

| primer name                                                                                                             | target gene              | modification   | 5'-3' sequence                                                          |
|-------------------------------------------------------------------------------------------------------------------------|--------------------------|----------------|-------------------------------------------------------------------------|
| <i>construction of non-polar deletion mutants*</i>                                                                      |                          |                |                                                                         |
| GatR_Del_fwd                                                                                                            | <i>gatR</i>              |                | AACTAGTTACAGTTAATTATCAGGCCAAATCAATATGAACTCATTGAGCGGTGTAGGCTGGAGCTGCTTC  |
| Gat_op_Del_rev                                                                                                          | <i>gatY - gatR/ gatR</i> |                | TAACCGACTCCTTTTTAGACGATCATTAAATCCACGCCTGTTTTGCTAACATATGAATATCCTCCTTA    |
| STM3254_Del_fwd                                                                                                         | <i>STM3254</i>           |                | GCGGCTGTGAAGGGCAACTGTGAGGAATCGCCTGTGATCTACACGCTAACGCTGTAGGCTGGAGCTGCTTC |
| STM3254_Del_rev                                                                                                         | <i>STM3254</i>           |                | TATTGTAATTTAACCTACAGCTTTCTGACGTGGATTTGCGAAAGTAAGGTCATATGAATATCCTCCTTA   |
| GatC_Del_fwd                                                                                                            | <i>gatC</i>              |                | AAATTCTGTCCATTCTCATGGGGTAACGTATGTTAGCGAAATAATGCGGTGTAGGCTGGAGCTGCTTC    |
| GatC_Del_rev                                                                                                            | <i>gatC</i>              |                | TTGCTCCCCTAAAATTAAGAGGCGATTGACTTTGCTGTAGCGCCGTGGCCATATGAATATCCTCCTTA    |
| gatR_Del-DR_fwd                                                                                                         | <i>gatR-DeoR</i>         |                | GGAAGTCATCTGGCGGAAGGCGACAATCAGGAAGTCATTCTGGAAGATCGGTGTAGGCTGGAGCTGCTTC  |
| gatR_Del_HTH_rev                                                                                                        | <i>gatR-HTH</i>          |                | GCAGCCGCTGGGCAATCCGCTTTTTCGGATCGCTGGCGAGTTGATACCCGATATGAATATCCTCCTTA    |
| AraA_Del_fwd                                                                                                            | <i>araA</i>              |                | GCAATCCTGACTCATTAAGGACACGACAATGACGATTTTGATAATTATGGTGTAGGCTGGAGCTGCTTC   |
| AraA_Del_rev                                                                                                            | <i>araA</i>              |                | CAATCCGTTTCACCAATTAACGTTTGAACCCGTAATACACCTCGTTCAGCATATGAATATCCTCCTTA    |
| Crp_Del_fwd                                                                                                             | <i>crp</i>               |                | CTGGAGACAGCTTATAACAGAGGATAACCGCGCATGGTCTTGGCAAACCGTGTAGGCTGGAGCTGCTTC   |
| Crp_Del_rev                                                                                                             | <i>crp</i>               |                | CCATTCTGACGGAATTAACGGGTGCCGTAGACGACGATGGTCTTGCCATGCATATGAATATCCTCCTTA   |
| <i>construction of pBR322-complementation vectors** and test of insertion of kanR and gene deletion</i>                 |                          |                |                                                                         |
| GatR_ScaI_fwd                                                                                                           | <i>gatR</i>              | <i>ScaI</i>    | GATC <u>AGTACT</u> CTGATGGTACGAGCCAGCAAC                                |
| GatOp_PstI_rev                                                                                                          | <i>gatY - gatR/ gatR</i> | <i>PstI</i>    | GATC <u>CTGCAG</u> CTTTCCTTCGGGCTTACTCTC                                |
| STM3254_PvuI_fwd                                                                                                        | <i>STM3254</i>           | <i>PvuI</i>    | GATC <u>CGATCG</u> CCC GCCACTATATGCAACC                                 |
| STM3254_PstI_rev                                                                                                        | <i>STM3254</i>           | <i>PstI</i>    | GATC <u>CTGCAG</u> GTATGCCAATACCGGTAG                                   |
| GatC_PvuI_fwd                                                                                                           | <i>gatC</i>              | <i>PvuI</i>    | GATC <u>CGATCG</u> CGTGGGTATTGAAGCATTAC                                 |
| GatC_PstI_rev                                                                                                           | <i>gatC</i>              | <i>PstI</i>    | GATC <u>CTGCAG</u> CATAACATTCTCCAGGAAGG                                 |
| AraA_fwd                                                                                                                | <i>araA</i>              |                | GATGGCGTTCGCTTATC                                                       |
| AraA_rev                                                                                                                | <i>araA</i>              |                | AGCTTTACCGCCGTACCAGCAG                                                  |
| Crp_fwd                                                                                                                 | <i>crp</i>               |                | GCATGTATGCAGAGGACATC                                                    |
| Crp_rev                                                                                                                 | <i>crp</i>               |                | ACCAGCGTTTGCCGTAGTGC                                                    |
| pBR322_PstI_seq***                                                                                                      | verify complementation   |                | GAGTAAGTAGTTCGCCAG                                                      |
| pBR322_ScaI_seq***                                                                                                      | verify complementation   |                | GCGCGGTATTATCCCCG                                                       |
| <i>construction of recombinant pBADMyc/HisC plasmids**</i>                                                              |                          |                |                                                                         |
| GatR_C_fwd_XhoI                                                                                                         | <i>gatR</i>              | <i>XhoI</i>    | GATCCTCGAGTATGAACTCATTGAGCGAAG                                          |
| GatR_C_rev_HindIII                                                                                                      | <i>gatR</i>              | <i>HindIII</i> | GATCAAGCTTGACGATCATTAAATCCACGC                                          |
| <i>cloning, testing and sequencing of reporter fusions pUTs-luxCDABE(Cm<sup>R</sup>) and pUTs-gfp(Cm<sup>R</sup>)**</i> |                          |                |                                                                         |
| PgatY_NotI_fwd                                                                                                          | promoter <i>gatY</i>     | <i>NotI</i>    | GATC <u>GCGGCCGC</u> AAAGTTATCCCGTGCTTAAAC                              |
| PgatY_KpnI_rev                                                                                                          | promoter <i>gatY</i>     | <i>KpnI</i>    | GATC <u>GGTACC</u> GGATGTTAAAGGCTGGCAGC                                 |
| PgatY_KpnI_fwd                                                                                                          | promoter <i>gatY</i>     | <i>KpnI</i>    | GATC <u>GGTACC</u> TCCGCTTCGTCGGGAAG                                    |
| PgatY_XmaI_rev                                                                                                          | promoter <i>gatY</i>     | <i>XmaI</i>    | GATC <u>CCCCGGG</u> TAAAGGCTGGCAGGCATAG                                 |
| P3257_NotI_fwd                                                                                                          | promoter <i>STM3257</i>  | <i>NotI</i>    | GATC <u>GCGGCCGC</u> AAAGATGCACAGCAGGCACTAC                             |
| P3257_KpnI_rev                                                                                                          | promoter <i>STM3257</i>  | <i>KpnI</i>    | GATC <u>GGTACC</u> TCTCCTGCTTTATGACGAGC                                 |
| P3257_KpnI_fwd                                                                                                          | promoter <i>STM3257</i>  | <i>KpnI</i>    | GATC <u>GGTACC</u> CGAAGATGCACAGCAGGCAC                                 |
| P3257_XmaI_rev                                                                                                          | promoter <i>STM3257</i>  | <i>XmaI</i>    | GATC <u>CCCCGGG</u> TCTCCTGCTTTATGACGAGC                                |
| PgatR_NotI_fwd                                                                                                          | promoter <i>gatR</i>     | <i>NotI</i>    | GATC <u>GCGGCCGC</u> AGTTGGATGAACTACTCCG                                |
| PgatR_KpnI_rev                                                                                                          | promoter <i>gatR</i>     | <i>KpnI</i>    | GATC <u>GGTACC</u> GAAAGGTCCATCACCAGCAC                                 |
| PgatR_KpnI_fwd                                                                                                          | promoter <i>gatR</i>     | <i>KpnI</i>    | GATC <u>GGTACC</u> TCTCCGCAAGTTGGATGAAC                                 |
| PgatR_XmaI_rev                                                                                                          | promoter <i>gatR</i>     | <i>XmaI</i>    | GATC <u>CCCCGGG</u> GAAAGGTCCATCACCAGCAC                                |

|               |                                                           |                      |
|---------------|-----------------------------------------------------------|----------------------|
| luxC1R***     | Test of insertion (pUTs- <i>lux</i> )                     | CATAAGGCAATATTTGCTCA |
| pUTs-TestF*** | Test of insertion (pUTs- <i>lux</i> or pUTs- <i>gfp</i> ) | TGGAATTCTGACTCTTATAC |
| GFPtestR      | Test of insertion (pUTs- <i>gfp</i> )                     | CCTTCACCCCTCTCCAC    |

*construction of fragments used in GMS assay\*\**

|                 |                                 |                          |
|-----------------|---------------------------------|--------------------------|
| PgatY_bs_fwd    | promoter <i>gatY</i>            | CACCGAATGCTCAATGG        |
| PgatY_bs_rev    | promoter <i>gatY</i>            | TAAAGGCTGGCAGGCATAG      |
| PgatY_1_1_fwd   | promoter <i>gatY</i> part I     | CACTTTTTCTTTCATTTAAG     |
| PgatY_SPR_1_rev | promoter <i>gatY</i> part I     | ACATGATTGTGATCATCAAC     |
| PgatY_SPR_2_fwd | promoter <i>gatY</i> part II    | ATTATCCTGCTTTTGTGTG      |
| PgatY_2_2_rev   | promoter <i>gatY</i> part II    | AGTAATGTAACGATCATTGC     |
| PgatY_SPR_3_fwd | promoter <i>gatY</i> part III   | ATGATCGTTACATTACTTTC     |
| PgatY_SPR_2_rev | promoter <i>gatY</i> part III   | TTTACTGGAAATAATGAAC      |
| GatY-54_fwd     | region upstream von STM3254     | GAGCGACTGGCAGAAATACG     |
| P54_bs_rev      | region upstream von STM3254     | CGCGCTATTAAGTGTAGCGTG    |
| 3254-55_fwd     | region upstream von STM3255     | CGCCAACGGTTGATTTGGTG     |
| P55_bs_rev      | region upstream von STM3255     | GGCTTCTCAGCCATAAATGTATGC |
| 3255-56_fwd     | region upstream von STM3256     | GATCCTTTCGCGTGCATCCC     |
| P56_bs_rev      | region upstream von STM3256     | TATCGAGGCGCTCATCGCTG     |
| P57_bs_fwd      | promoter <i>gatZ</i>            | CCACCAGAAGTCATGCAGCCAAAG |
| P57_bs_rev      | promoter <i>gatZ</i>            | CAGATGCCAGATGTTCTCC      |
| P57_SPR_2_fwd   | promoter <i>gatZ</i> part I     | ATTACACACCATTTTCGTTAC    |
| PgatZ_2_1_rev   | promoter <i>gatZ</i> part I     | AAATGAAAGTTTCGAAAGG      |
| P57_SPR_3_fwd   | promoter <i>gatZ</i> part II    | TTTCGAAACTTTCATTTATC     |
| PgatZ_3_2_rev   | promoter <i>gatZ</i> part II    | ATAGGCTTTCGTAATGTTG      |
| PgatZ_2_3_fwd   | promoter <i>gatZ</i> part III   | CAACATTACGAAAGCC         |
| P57_SPR_2_rev   | promoter <i>gatZ</i> part III   | CGAGCAATTATTTCTTTCAC     |
| 3257-gatA_fwd   | region upstream von <i>gatA</i> | CACCCGCGTATTCGTCAAAG     |
| PgatA_bs_rev    | region upstream von <i>gatA</i> | TCTCTTTGCCAATGTGCGCC     |
| gatA-B_fwd      | region upstream von <i>gatB</i> | CCGCCTGTTTAGTGAGCTAC     |
| PgatB_bs_rev    | region upstream von <i>gatB</i> | CGCCGTCCATATAGGTTTCG     |
| gatB-C_fwd      | region upstream von <i>gatC</i> | GAGCTCGACTTAGTGCAATG     |
| PgatC_bs_rev    | region upstream von <i>gatC</i> | CCAAGCTTCATCCCAGCAG      |
| gatC-D_fwd      | region upstream von <i>gatD</i> | ACCCAAGTGGCTGCCAATGC     |
| PgatD_bs-rev    | region upstream von <i>gatD</i> | TCTCCCTCAGCGTGAATAAC     |
| gatD-R_fwd      | promoter <i>gatR</i>            | CCAGGAGAAGAATGGGAAAC     |
| PgatR_bs_rev    | promoter <i>gatR</i>            | CGCTGCCTTGCGTATTAATC     |
| PgatR_1_1_fwd   | promoter <i>gatR</i> part I     | TCAACTTTCCTGATGGTACG     |
| PgatR_SPR_1_rev | promoter <i>gatR</i> part I     | GGAAATGTGAGCCAGCGCAG     |
| PgatR_SPR-2_fwd | promoter <i>gatR</i> part II    | CATGCAGGGCAAAAATTTTAC    |
| PgatR_SPR-2_rev | promoter <i>gatR</i> part II    | AGTTCATATTGATTTGCCTG     |

*SPR*

|                  |                      |              |                           |
|------------------|----------------------|--------------|---------------------------|
| PgY_SPR-2_fwd_bt | promoter <i>gatY</i> | biotinylated | ATTATCCTGCTTTTGTGTG       |
| PgatY_SPR-2_rev  | promoter <i>gatY</i> |              | TTTACTGGAAATAATGAAC       |
| P57_SPR-2_fwd_bt | promoter <i>gatZ</i> | biotinylated | ATTACACACCATTTTCGTTAC     |
| P57_SPR-2_rev    | promoter <i>gatZ</i> |              | CGAGCAATTATTTCTTTCAC      |
| PgR_SPR-2_fwd_bt | promoter <i>gatR</i> | biotinylated | BIO-CATGCAGGGCAAAAATTTTAC |

|                 |                                |              |                      |
|-----------------|--------------------------------|--------------|----------------------|
| PgatR_SPR-2_rev | promoter <i>gatR</i>           |              | AGTTCATATTGATTGCCTG  |
| argS_SPR_fwd_bt | promoter <i>argS</i>           | biotinylated | CAACCTTTGATTGATTG    |
| argS-conbs_rev  | promoter <i>argS</i>           |              | AAGAGCCTGAATATTCAC   |
| gatC_SPR_fwd_bt | upstream region of <i>gatC</i> | biotinylated | GGCTGGTGATTGGTGTACTG |
| gatC_SPR_rev    | upstream region of <i>gatC</i> |              | CAGTAGCGCTGGATCAAGGC |
| agaR_SPR_fwd_bt | promoter <i>agaR</i>           | biotinylated | CCATTGAGCATTCCGGTG   |
| agaR_SPR_rev    | promoter <i>agaR</i>           |              | CAACAGGCTGGTAGATGGTT |

\* template DNA: pKD4

\*\* template DNA: chromosomal DNA of *S. Typhimurium* ST4/74

\*\*\*template DNA: plasmid in mutants (complementation, promoterfusions)

Table S2. Growth attenuation of mutants during colonization of animals.

| ST4/74      | Mouse FC | Chicken FS | Pig FS | Calf FS |
|-------------|----------|------------|--------|---------|
| <i>gatY</i> | -0,15    | -0,01      |        | -0,34   |
|             | -0,07    | 1,04       |        | 1,2     |
|             | 0,07     | 0,75       |        | 0,41    |
|             | 0,49     | -5,05      | -15    |         |
| STM3254     | 0,97     | -1,36      | -0,37  | -0,5    |
|             | 0,43     | -4,26      | -15    | -15     |
|             | 0,42     | -2,78      | -15    | -15     |
|             | 0,67     |            |        |         |
|             | -1,59    |            |        |         |
|             | 0,062    |            |        |         |
| STM3255     | 0,10     | -6,22      | -15    | -15     |
|             | -0,02    | -2,79      | -15    | -7,61   |
|             | -0,5     | -0,28      | -0,02  | 0,03    |
|             | 0,19     | 0,57       | -0,002 | 1,75    |
|             | -0,54    |            |        |         |
| <i>gatR</i> | -1,38    | -8,82      | -4,87  | -5,25   |
|             |          | -5,51      | -1,60  |         |
|             |          | -8,52      | -1,18  |         |



## Supplementary Material:

The first *gat* gene cluster represented by that of strain ST4/74 is present in the genomes of *S. enterica* serovars Aqua, Abony, Bareilly, Bovismorbificans, Braenderup, Cerro, var. Copenhagen, Give, Hadar, Hartford, Hvittingfoss, Inverness, Javiani, LT2, Manhattan, Mississippi, Montevideo, Muenster, Muenchen, Namur, Norwich, Paratyphi A, Paratyphi B, Pomona, Poona, Ohio, Rubislaw, Saintpaul, Thompson, Typhi, Uganda, and Wandsworth.

The second type *gat* gene cluster is found in *S. enterica* serovars Agona, Alachua, Albany, Baidon, Bredeney, Chester, Choleraesuis, Cubana, Derby, Dublin, Enteritidis, Gallinarum, Gallinarum/Pullorum, Gaminara, Havana, Heidelberg, Indiana, Infantis, Kentucky, Mbandaka, Meleagridis, Nchanga, Newport, Rissen, Schwarzengrund, Senftenberg, Tennessee, Virchow, Weltevreden, and Worthington as well as in the species *S. bongori*.

The genes of the galactitol operon are completely absent in the genomes of *S. enterica* subspecies *salamae*, *arizonae*, *diarizonae*, *houtenae*, and *indica* (serovar Bornheim).
